# Supplementary material for: Multiplex one-step direct asymmetric PCR of blood and dual-labelled probe-mediated melting curve for genotyping of MTHFR and MTRR polymorphisms
Source: Royal Society of Chemistry journal article supplement (doi:10.1039/d4ra07286c), 2025-01-01
Supplement: d4ra07286c1.pdf [file d4ra07286c1.pdf]

**Multiplex one-step blood direct asymmetric PCR and dual labelled  
probe mediated melting curve for MTHFR and MTRR  
polymorphisms genotyping**

Zhang Zhang <sup>a,\*</sup>, Lian Li <sup>b</sup>, Juan Yao <sup>b,\*</sup>

<sup>a</sup> Department of Neurosurgery, Neurology Center, The First Affiliated Hospital of Hainan Medical University, Haikou, Hainan 571199, PR China.

<sup>b</sup> Nanobiosensing and Microfluidic Point-of-Care Testing, Key Laboratory of Luzhou, Department of Clinical Laboratory, The Affiliated Traditional Chinese Medicine Hospital, Southwest Medical University, Luzhou, Sichuan 646000, PR China

\* Correspondence author

E-mail: [cqzhangzhang@gmail.com](mailto:cqzhangzhang@gmail.com) for Zhang Zhang, and [396497795@qq.com](mailto:396497795@qq.com) for Juan Yao.

## Table of Contents

|                |                                                                                                                 |      |
|----------------|-----------------------------------------------------------------------------------------------------------------|------|
| Table S1       | Sequences of the designed oligonucleotides for blood direct PCR and HRM genotyping                              | S-3  |
| Table S2       | Mean T <sub>m</sub> values and SDs of homozygous genotypes                                                      | S-3  |
| Table S3       | Melting curves genotyping results of blood samples and gDNA samples                                             | S-3  |
| Table S4       | WBC counts and cycle threshold (Ct) values in HEX, ROX, Cy5 channels of 50 clinical samples                     | S-5  |
| Table S5       | Genotype distribution in the blinded study                                                                      | S-6  |
| Figure S1      | Original screenshots of amplification curves and melting curves for No.1 to 6 EDTA anticoagulated blood samples | S-7  |
| Figure S2      | Original screenshots of amplification curves and melting curves for No.1 to 6 extracted gDNA samples            | S-8  |
| Figure S3      | Original screenshots of amplification curves and derivate melting curves corresponding in Figure 2              | S-9  |
| Figure S4-S6   | Sanger sequencing results of CC, CT and TT genotype of C677T loci                                               | S-10 |
| Figure S7-S9   | Sanger sequencing results of AA, AC and CC genotype of A1298C loci                                              | S-11 |
| Figure S10-S12 | Sanger sequencing results of AA, AG and GG genotype of A66G loci                                                | S-12 |
| Figure S13     | Amplifications and melting curves for gDNA samples of No. 1 to 24                                               | S-13 |
| Figure S14     | Amplifications and melting curves for gDNA samples of No. 25 to 50                                              | S-14 |
| Figure S15     | Amplifications and melting curves for whole blood samples of No. 1 to 24                                        | S-15 |
| Figure S16     | Amplifications and melting curves for whole blood samples of No. 25 to 50                                       | S-16 |
| Figure S17     | Limit of detection confirmation                                                                                 | S-17 |
| Figure S18     | Whole blood sample volume resistance                                                                            | S-18 |
| Figure S19     | 1, 2, 3 and 4 weeks blood sample storage robustness                                                             | S-18 |
| Figure S20     | Analysis of plasma samples                                                                                      | S-19 |

**Table S1.** Sequences of the designed oligonucleotides for blood direct PCR and HRM genotyping

| Name                   | Oligonucleotide Sequence (5'-3')        | Size  |
|------------------------|-----------------------------------------|-------|
| C677T- Forward Primer  | ATCCCTCGCCTTGAACAGGT                    |       |
| C677T- Reverse Primer  | ATGCCTTCACAAAGCGGAAG                    | 199bp |
| C677T- Probe           | HEX-TATGCGGGAG <u>CC</u> GATTTCATC-BHQ1 |       |
| A1298C- Forward Primer | CCCACTCCAGCATCACTCACTT                  |       |
| A1298C- Reverse Primer | TACCTGAAGAGCAAGTCCCCC                   | 149bp |
| A1298C- Probe          | ROX-AAAGACACTT <u>T</u> CTTCACTGGT-BHQ2 |       |
| A66G- Forward Primer   | ATGCCTTGAAGTGATGAGGAGG                  |       |
| A66G- Reverse Primer   | CCACTGTAACGGCTCTAACCTTAT                | 161bp |
| A66G- Probe            | Cy5-CAGAAGAAAT <u>A</u> TGTGAGCAAG-BHQ2 |       |

Note: Red letters represent dominant primers and blue letters represent inferior primers. Forward and reverse primers are also used for C677T, A1298C and A66G polymorphisms sequencing. Underline letters represent polymorphisms sites probe binding to target.

**Table S2.** Mean T<sub>m</sub> values and SDs of homozygous genotypes

|               | Wild type           |        | Variant             |        | ΔT <sub>m</sub> , °C |
|---------------|---------------------|--------|---------------------|--------|----------------------|
|               | T <sub>m</sub> , °C | SD, °C | T <sub>m</sub> , °C | SD, °C |                      |
| <b>C677T</b>  | 66.1                | 0.43   | 56.1                | 0.33   | 10.0                 |
| <b>A1298C</b> | 62.1                | 0.38   | 54.5                | 0.36   | 7.6                  |
| <b>A66G</b>   | 62.4                | 0.40   | 55.1                | 0.31   | 7.3                  |

**Table S3.** Melting curves genotyping results of blood samples and gDNA samples

| No. | Direct blood PCR and HRM |        |      | gDNA PCR and HRM |        |      |
|-----|--------------------------|--------|------|------------------|--------|------|
|     | C677T                    | A1298C | A66G | C677T            | A1298C | A66G |
| 1   | CC                       | AC     | AG   | CC               | AC     | AG   |
| 2   | CC                       | AA     | AG   | CC               | AA     | AG   |
| 3   | CT                       | AC     | AA   | CT               | AC     | AA   |
| 4   | CT                       | AA     | AG   | CT               | AA     | AG   |
| 5   | TT                       | AA     | AG   | TT               | AA     | AG   |
| 6   | CC                       | AA     | AG   | CC               | AA     | AG   |
| 7   | TT                       | AA     | AA   | TT               | AA     | AA   |
| 8   | CC                       | AA     | AA   | CC               | AA     | AA   |
| 9   | CT                       | AA     | GG   | CT               | AA     | GG   |
| 10  | CT                       | AC     | AA   | CT               | AC     | AA   |

|    |    |    |    |    |    |    |
|----|----|----|----|----|----|----|
| 11 | CC | AC | AA | CC | AC | AA |
| 12 | TT | AA | AA | TT | AA | AA |
| 13 | CC | AC | GG | CC | AC | GG |
| 14 | CC | AC | AA | CC | AC | AA |
| 15 | CC | AC | AG | CC | AC | AG |
| 16 | CT | AA | AG | CT | AA | AG |
| 17 | CT | AA | AA | CT | AA | AA |
| 18 | CT | AA | AA | CT | AA | AA |
| 19 | CT | AA | AA | CT | AA | AA |
| 20 | CC | AC | AA | CC | AC | AA |
| 21 | CT | AA | AG | CT | AA | AG |
| 22 | CC | AA | AA | CC | AA | AA |
| 23 | TT | AA | AA | TT | AA | AA |
| 24 | CT | AC | AA | CT | AC | AA |
| 25 | TT | AC | AA | TT | AC | AA |
| 26 | CT | AA | AA | CT | AA | AA |
| 27 | TT | AA | AG | TT | AA | AG |
| 28 | CC | AA | AG | CC | AA | AG |
| 29 | CC | AA | AA | CC | AA | AA |
| 30 | CC | AA | AA | CC | AA | AA |
| 31 | CT | AC | AG | CT | AC | AG |
| 32 | CT | AC | AA | CT | AC | AA |
| 33 | CT | AA | AG | CT | AA | AG |
| 34 | CC | CC | AA | CC | CC | AA |
| 35 | CC | AC | AG | CC | AC | AG |
| 36 | CC | AA | AA | CC | AA | AA |
| 37 | CT | AC | AA | CT | AC | AA |
| 38 | CT | AA | GG | CT | AA | GG |
| 39 | CT | AA | AA | CT | AA | AA |
| 40 | CT | AC | AA | CT | AC | AA |
| 41 | CT | AA | GG | CT | AA | GG |
| 42 | CT | AA | AG | CT | AA | AG |
| 43 | CT | AA | AG | CT | AA | AG |
| 44 | CC | AA | AA | CC | AA | AA |
| 45 | CT | AC | AG | CT | AC | AG |
| 46 | CT | AA | AA | CT | AA | AA |
| 47 | TT | AA | AA | TT | AA | AA |
| 48 | CC | AA | AA | CC | AA | AA |
| 49 | CC | AA | AG | CC | AA | AG |
| 50 | CT | AA | GG | CT | AA | GG |

**Table S4.** WBC counts and cycle threshold (Ct) values in HEX, ROX, Cy5 channels

of 50 clinical samples

| No. | WBC              | Direct blood PCR and HRM |                 |               | gDNA PCR and HRM |                 |               |
|-----|------------------|--------------------------|-----------------|---------------|------------------|-----------------|---------------|
|     | (*10E3/ $\mu$ L) | C677T<br>(HEX)           | A1298C<br>(ROX) | A66G<br>(Cy5) | C677T<br>(HEX)   | A1298C<br>(ROX) | A66G<br>(Cy5) |
| 1   | 6.01             | 28.24                    | 29.89           | 31.84         | 30.21            | 30.94           | 31.14         |
| 2   | 6.79             | 27.38                    | 28.15           | 31.55         | 30.94            | 30.52           | 32.01         |
| 3   | 4.87             | 30.22                    | 32.47           | 32.64         | 32.28            | 32.59           | 31.13         |
| 4   | 3.45             | 29.26                    | 29.73           | 33.06         | 32.58            | 31.34           | 32.64         |
| 5   | 5.43             | NoCt                     | 31.02           | 37.50         | NoCt             | 31.92           | 31.02         |
| 6   | 5.97             | 26.25                    | 27.91           | 31.99         | 30.38            | 30.95           | 31.20         |
| 7   | 4.12             | NoCt                     | 33.43           | 34.30         | NoCt             | 31.65           | 30.96         |
| 8   | 8.64             | 28.16                    | 28.93           | 31.82         | 30.60            | 31.04           | 29.52         |
| 9   | 7.01             | 31.15                    | 29.68           | NoCt          | 29.72            | 27.86           | 45.03         |
| 10  | 7.48             | 29.11                    | 29.17           | 30.15         | 31.35            | 31.00           | 29.73         |
| 11  | 8.19             | 29.00                    | 30.73           | 30.45         | 29.83            | 30.65           | 29.17         |
| 12  | 4.65             | 44.65                    | 29.81           | 31.05         | 37.30            | 31.15           | 30.88         |
| 13  | 6.44             | 28.96                    | 30.40           | NoCt          | 30.53            | 31.70           | NoCt          |
| 14  | 5.88             | 28.76                    | 28.54           | 28.87         | 30.51            | 32.00           | 30.19         |
| 15  | 8.00             | 28.67                    | 30.04           | 31.68         | 29.68            | 30.76           | 30.49         |
| 16  | 9.81             | 27.40                    | 26.82           | 29.37         | 31.02            | 29.95           | 30.48         |
| 17  | 3.92             | 28.33                    | 27.48           | 29.26         | 31.37            | 29.11           | 29.93         |
| 18  | 9.68             | 27.39                    | 26.37           | 28.46         | 29.97            | 28.02           | 28.87         |
| 19  | 9.02             | 29.03                    | 28.54           | 30.21         | 31.23            | 29.21           | 29.47         |
| 20  | 8.95             | 28.15                    | 29.66           | 30.10         | 28.72            | 29.52           | 28.60         |
| 21  | 4.80             | 29.09                    | 28.61           | 30.71         | 31.22            | 29.42           | 30.68         |
| 22  | 9.80             | 27.79                    | 28.22           | 29.59         | 28.99            | 28.24           | 28.51         |
| 23  | 6.45             | 32.93                    | 27.89           | 30.32         | 34.81            | 29.42           | 29.57         |
| 24  | 5.30             | 30.22                    | 30.28           | 31.58         | 30.63            | 30.25           | 29.25         |
| 25  | 12.19            | NoCt                     | 27.94           | 28.73         | NoCt             | 28.16           | 28.57         |
| 26  | 6.98             | 29.19                    | 28.49           | 30.00         | 32.05            | 30.10           | 30.20         |
| 27  | 10.92            | 32.44                    | 28.29           | 31.84         | 35.04            | 28.64           | 30.93         |
| 28  | 7.16             | 29.40                    | 29.93           | 32.52         | 30.77            | 30.23           | 32.19         |
| 29  | 4.84             | 28.29                    | 28.90           | 30.26         | 30.62            | 30.29           | 31.45         |
| 30  | 4.00             | 29.26                    | 29.96           | 31.47         | 29.22            | 29.19           | 29.78         |
| 31  | 10.74            | 28.17                    | 28.75           | 30.63         | 29.74            | 28.31           | 28.12         |
| 32  | 2.51             | 32.23                    | 32.20           | 32.85         | 31.17            | 30.59           | 30.20         |
| 33  | 4.36             | 30.81                    | 29.87           | 32.90         | 32.09            | 30.29           | 31.15         |
| 34  | 8.45             | 29.18                    | NoCt            | 31.21         | 29.59            | NoCt            | 29.43         |
| 35  | 6.07             | 29.74                    | 31.53           | 32.43         | 30.42            | 30.62           | 31.76         |
| 36  | 5.53             | 28.47                    | 29.03           | 31.00         | 30.22            | 29.48           | 30.27         |
| 37  | 7.45             | 28.00                    | 28.68           | 29.45         | 30.08            | 29.63           | 29.72         |

|    |       |       |       |       |       |       |       |
|----|-------|-------|-------|-------|-------|-------|-------|
| 38 | 8.95  | 29.53 | 28.84 | NoCt  | 31.44 | 30.04 | 44.89 |
| 39 | 6.69  | 28.08 | 27.57 | 29.87 | 31.56 | 31.16 | 30.97 |
| 40 | 8.55  | 28.90 | 29.23 | 29.94 | 29.98 | 29.33 | 28.87 |
| 41 | 6.13  | 27.88 | 27.15 | 29.61 | 30.77 | 29.22 | 29.15 |
| 42 | 9.02  | 27.66 | 27.99 | 30.68 | 28.90 | 27.54 | 28.48 |
| 43 | 10.14 | 25.61 | 26.29 | 29.83 | 30.15 | 28.37 | 29.39 |
| 44 | 6.83  | 23.15 | 24.53 | 27.49 | 28.98 | 28.68 | 28.98 |
| 45 | 4.62  | 26.88 | 28.01 | 32.66 | 31.27 | 30.90 | 31.07 |
| 46 | 5.86  | 29.32 | 31.53 | 30.87 | 30.45 | 28.85 | 29.59 |
| 47 | 3.86  | 45.32 | 29.36 | 31.24 | NoCt  | 30.23 | 30.31 |
| 48 | 5.50  | 23.39 | 26.26 | 30.27 | 30.42 | 30.00 | 29.77 |
| 49 | 6.42  | 27.60 | 27.97 | 31.28 | 29.27 | 28.49 | 29.98 |
| 50 | 10.10 | 28.14 | 27.51 | NoCt  | 31.36 | 29.78 | NoCt  |

**Table S5.** Genotype distribution in the blinded study

|               | Genotype |              |            |
|---------------|----------|--------------|------------|
|               | Wild     | Heterozygote | Homozygote |
| <b>C677T</b>  | 19       | 24           | 7          |
| <b>A1298C</b> | 33       | 16           | 1          |
| <b>A66G</b>   | 28       | 17           | 5          |

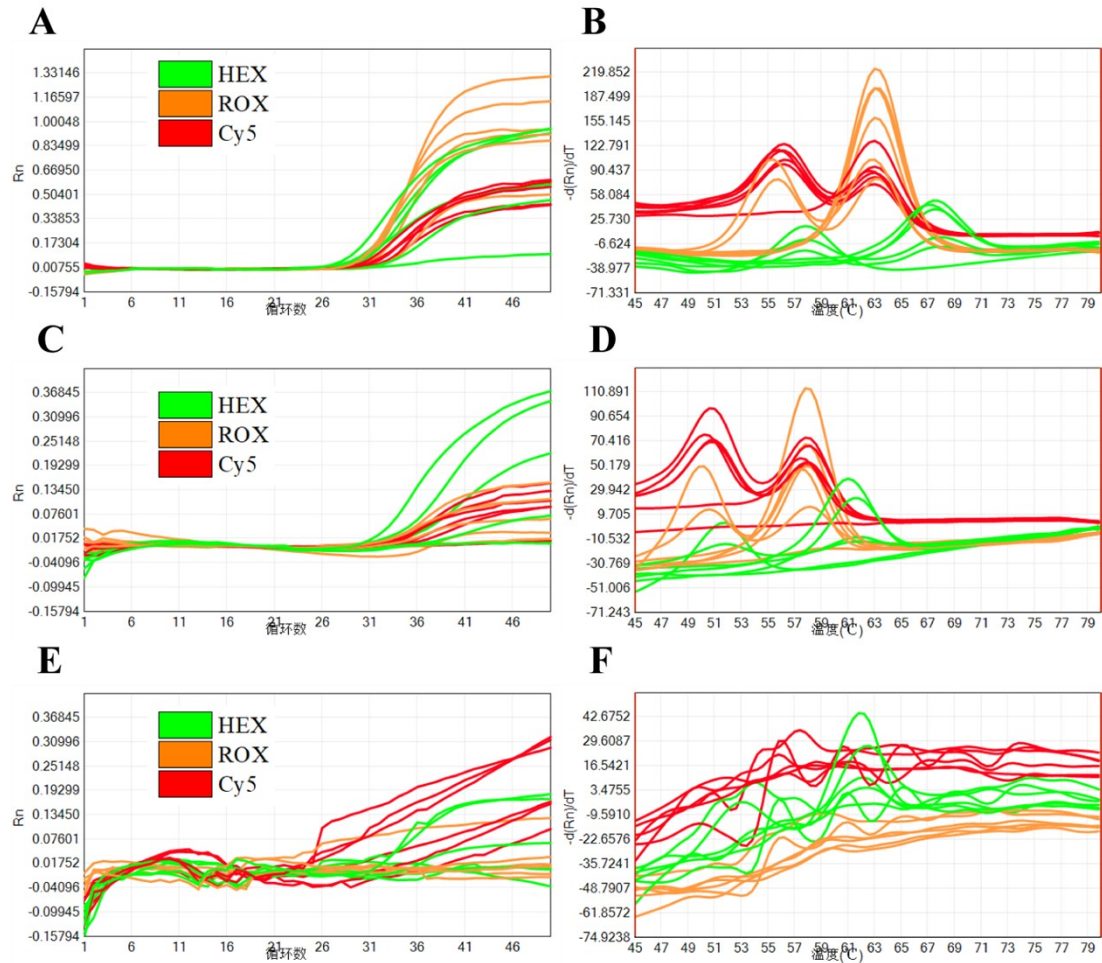

**Figure S1** Original screenshots of amplification curves and melting curves for No.1 to 6 EDTA anticoagulated blood samples. PCR mix of Meridian Bioscience (A and B), Yeasen Biotech Co. (C and D) and FOREGENE Biotech Co. (E and F) were used.

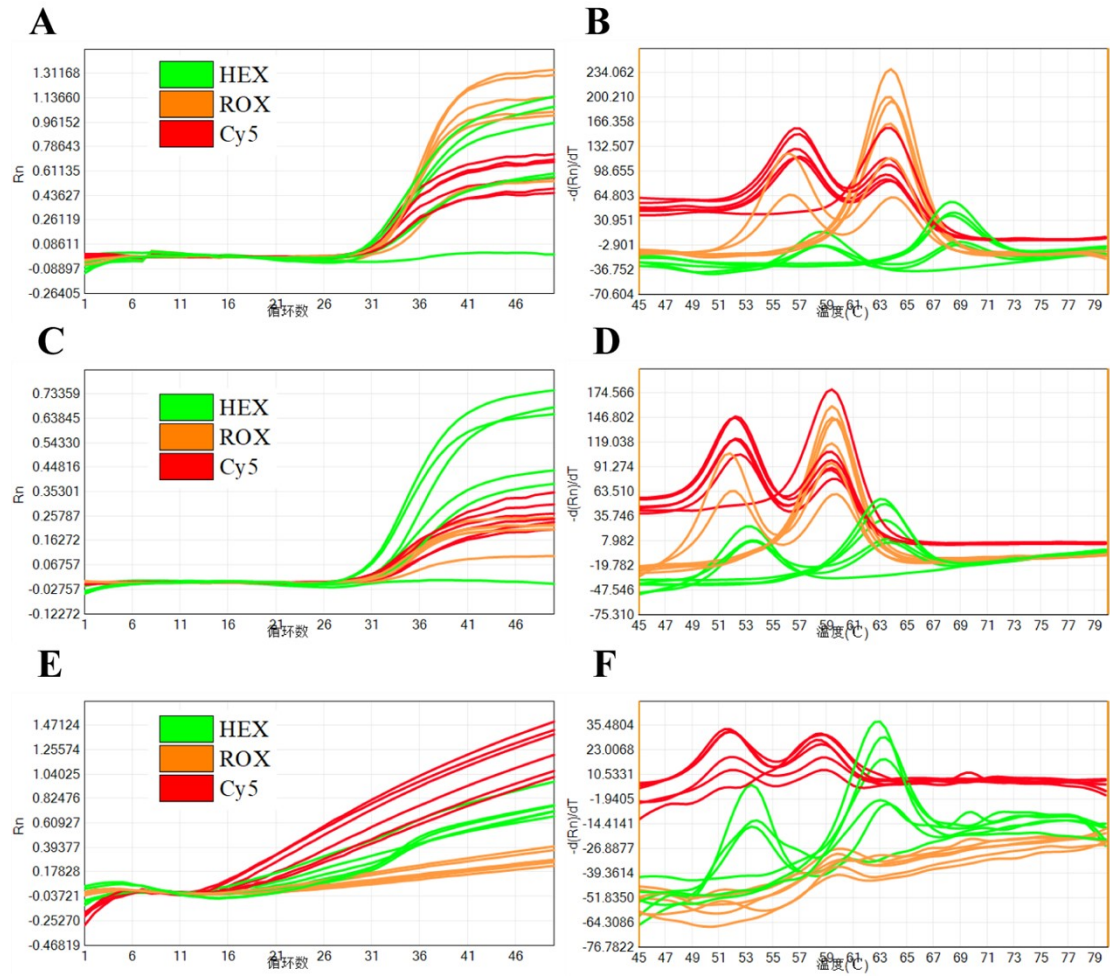

**Figure S2** Original screenshots of amplification curves and melting curves for No.1 to 6 extracted gDNA samples. PCR mix of Meridian Bioscience (A and B), Yeasen Biotech Co. (C and D) and FOREGENE Biotech Co. (E and F) were used.



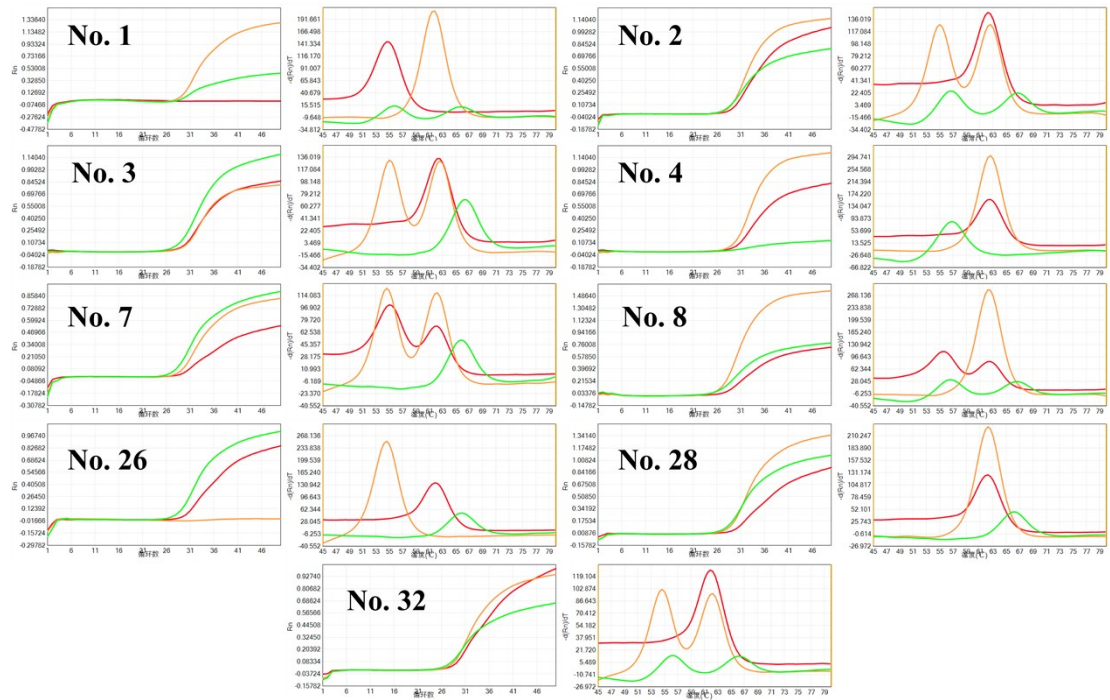

**Figure S3** Original screenshots of amplification curves and derivate melting curves corresponding in Figure 2.

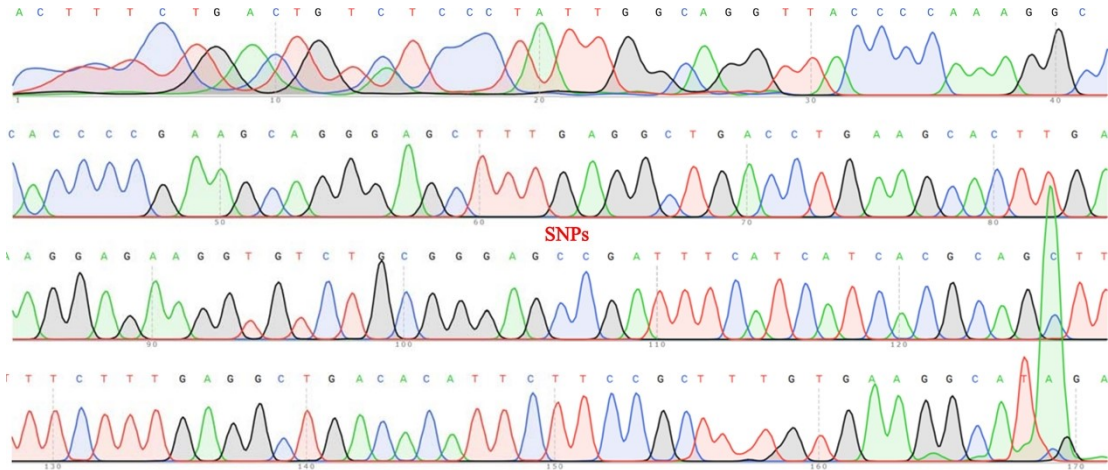

**Figure S4** Sanger sequencing results of CC genotype of C677T loci

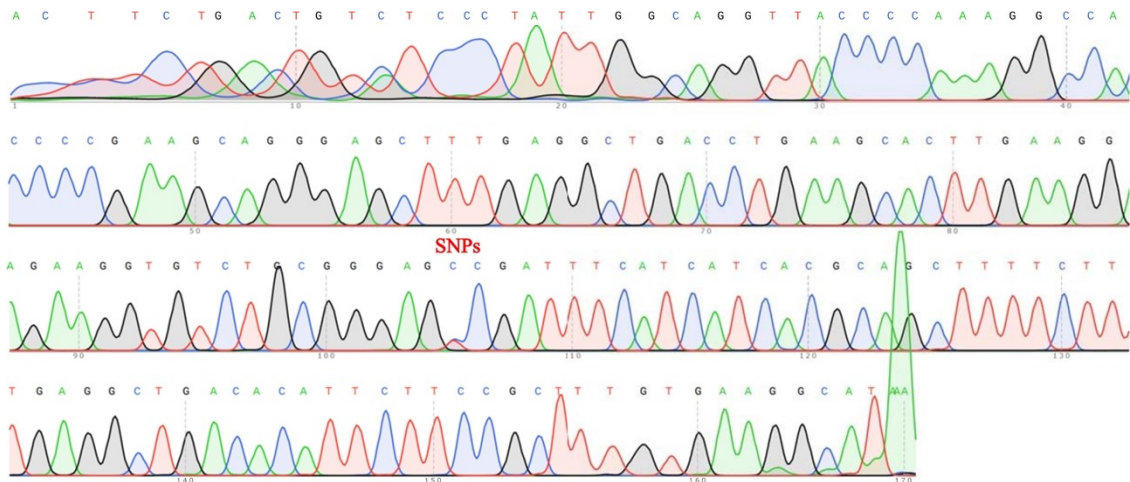

**Figure S5** Sanger sequencing results of CT genotype of C677T loci

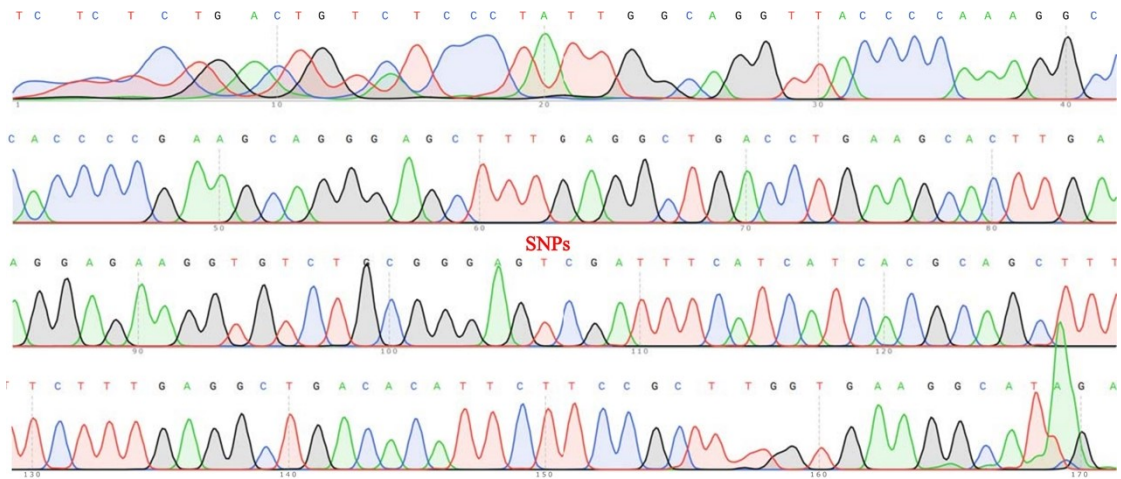

**Figure S6** Sanger sequencing results of TT genotype of C677T loci

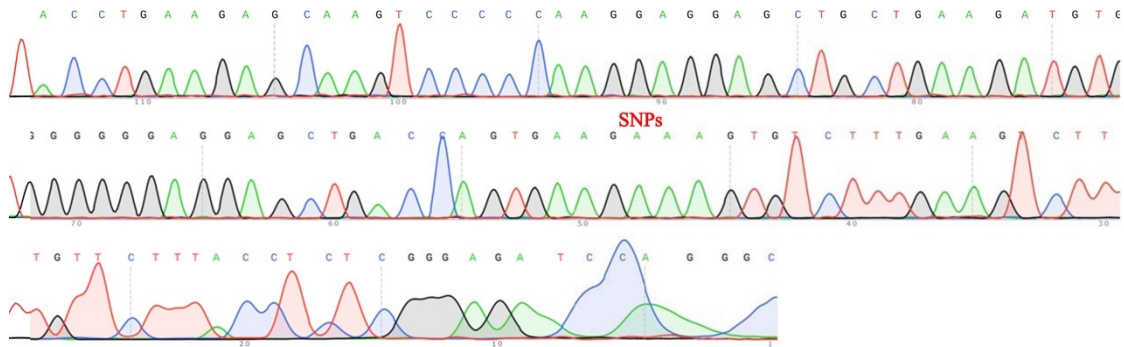

**Figure S7** Sanger sequencing results of AA genotype of A1298C loci

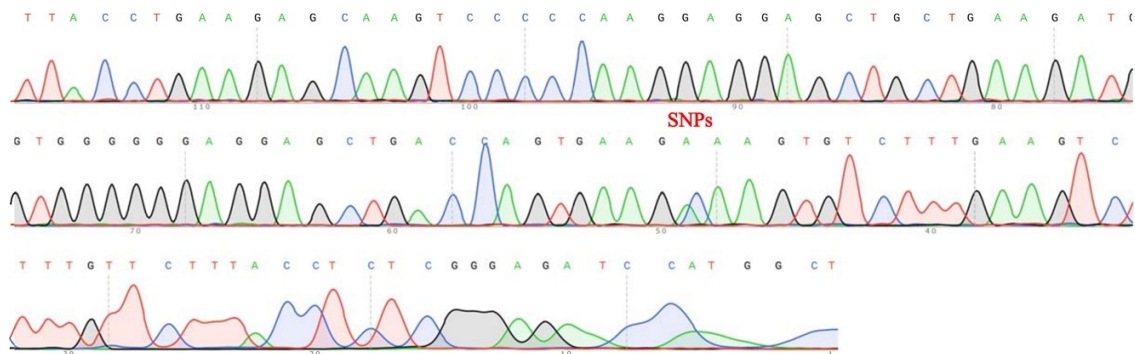

**Figure S8** Sanger sequencing results of AC genotype of A1298C loci

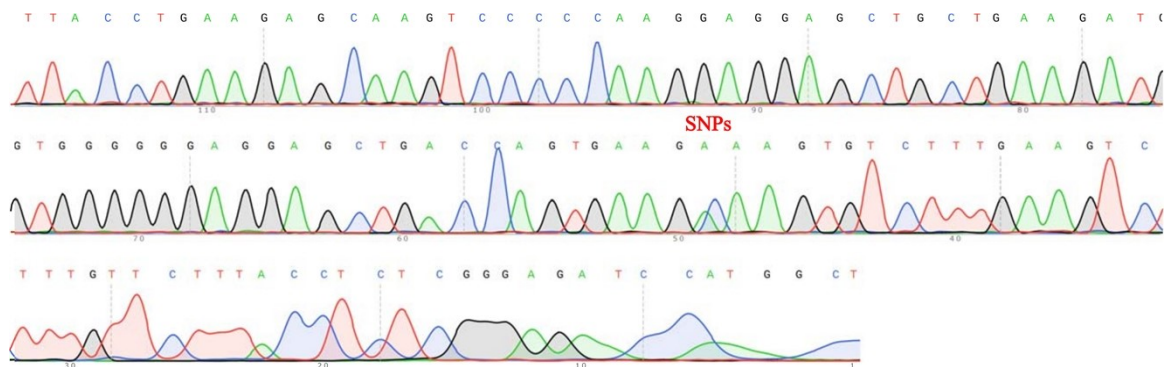

**Figure S9** Sanger sequencing results of CC genotype of A1298C loci

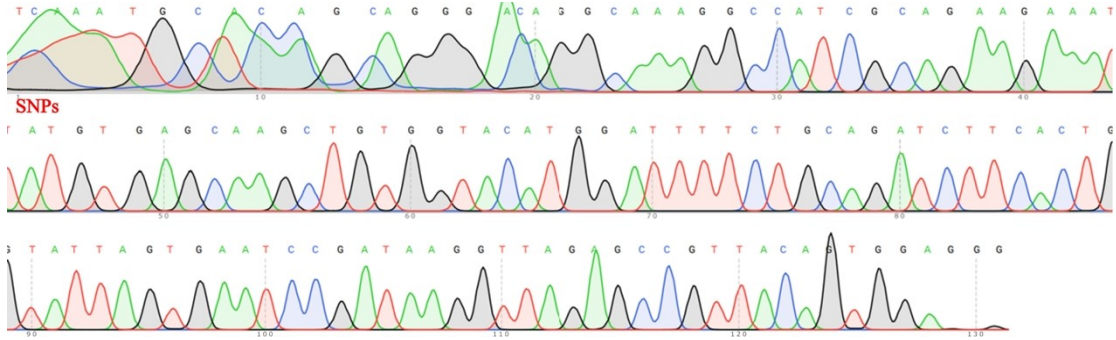

**Figure S10** Sanger sequencing results of AA genotype of A66G loci

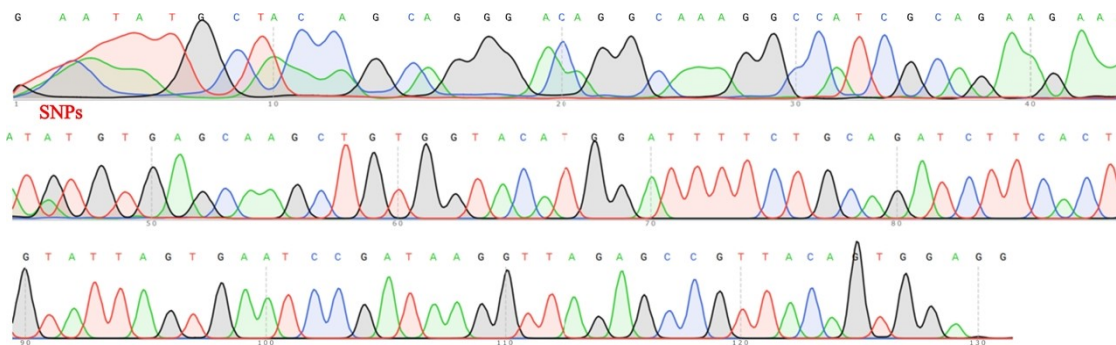

**Figure S11** Sanger sequencing results of AG genotype of A66G loci

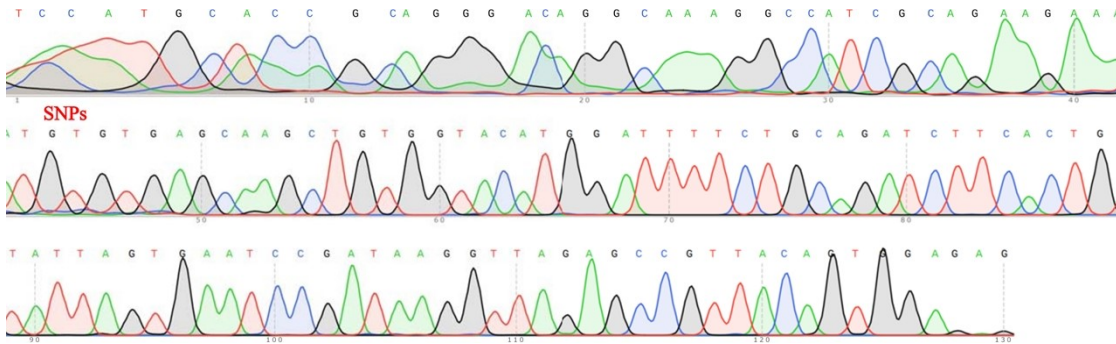

**Figure S12** Sanger sequencing results of GG genotype of A66G loci

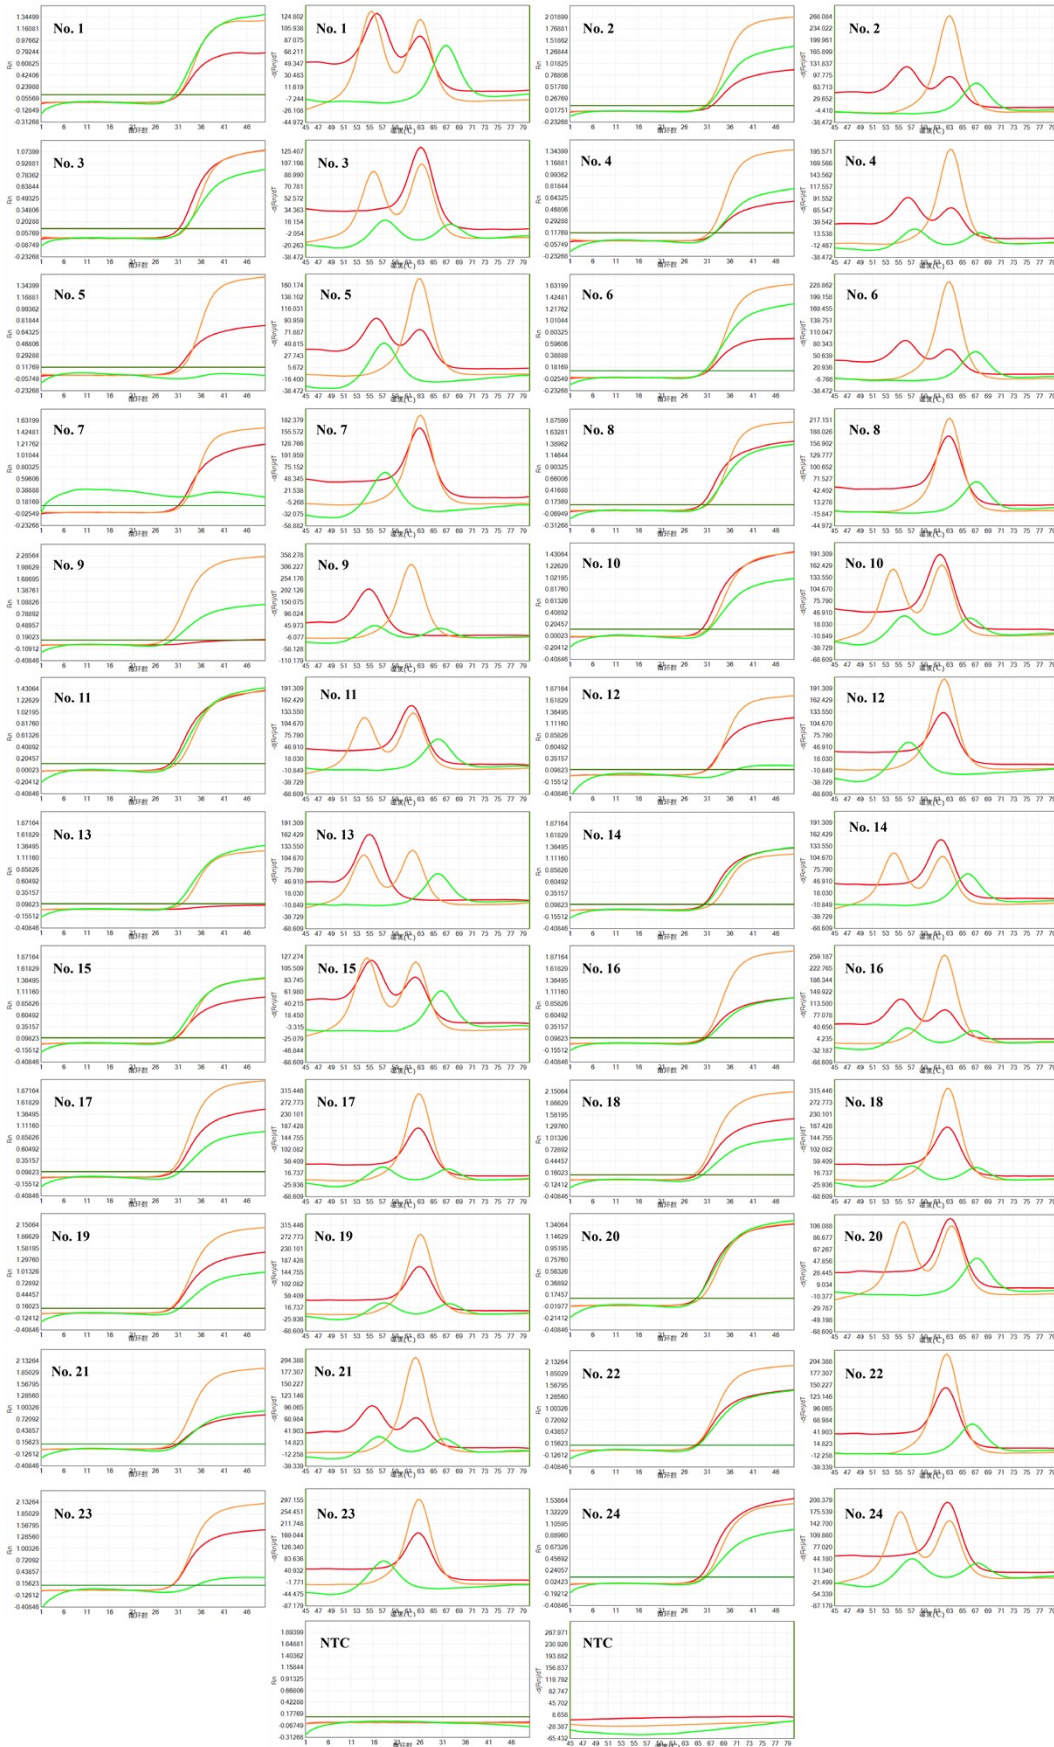

**Figure S13** Amplifications and melting curves for gDNA samples of No. 1 to 24

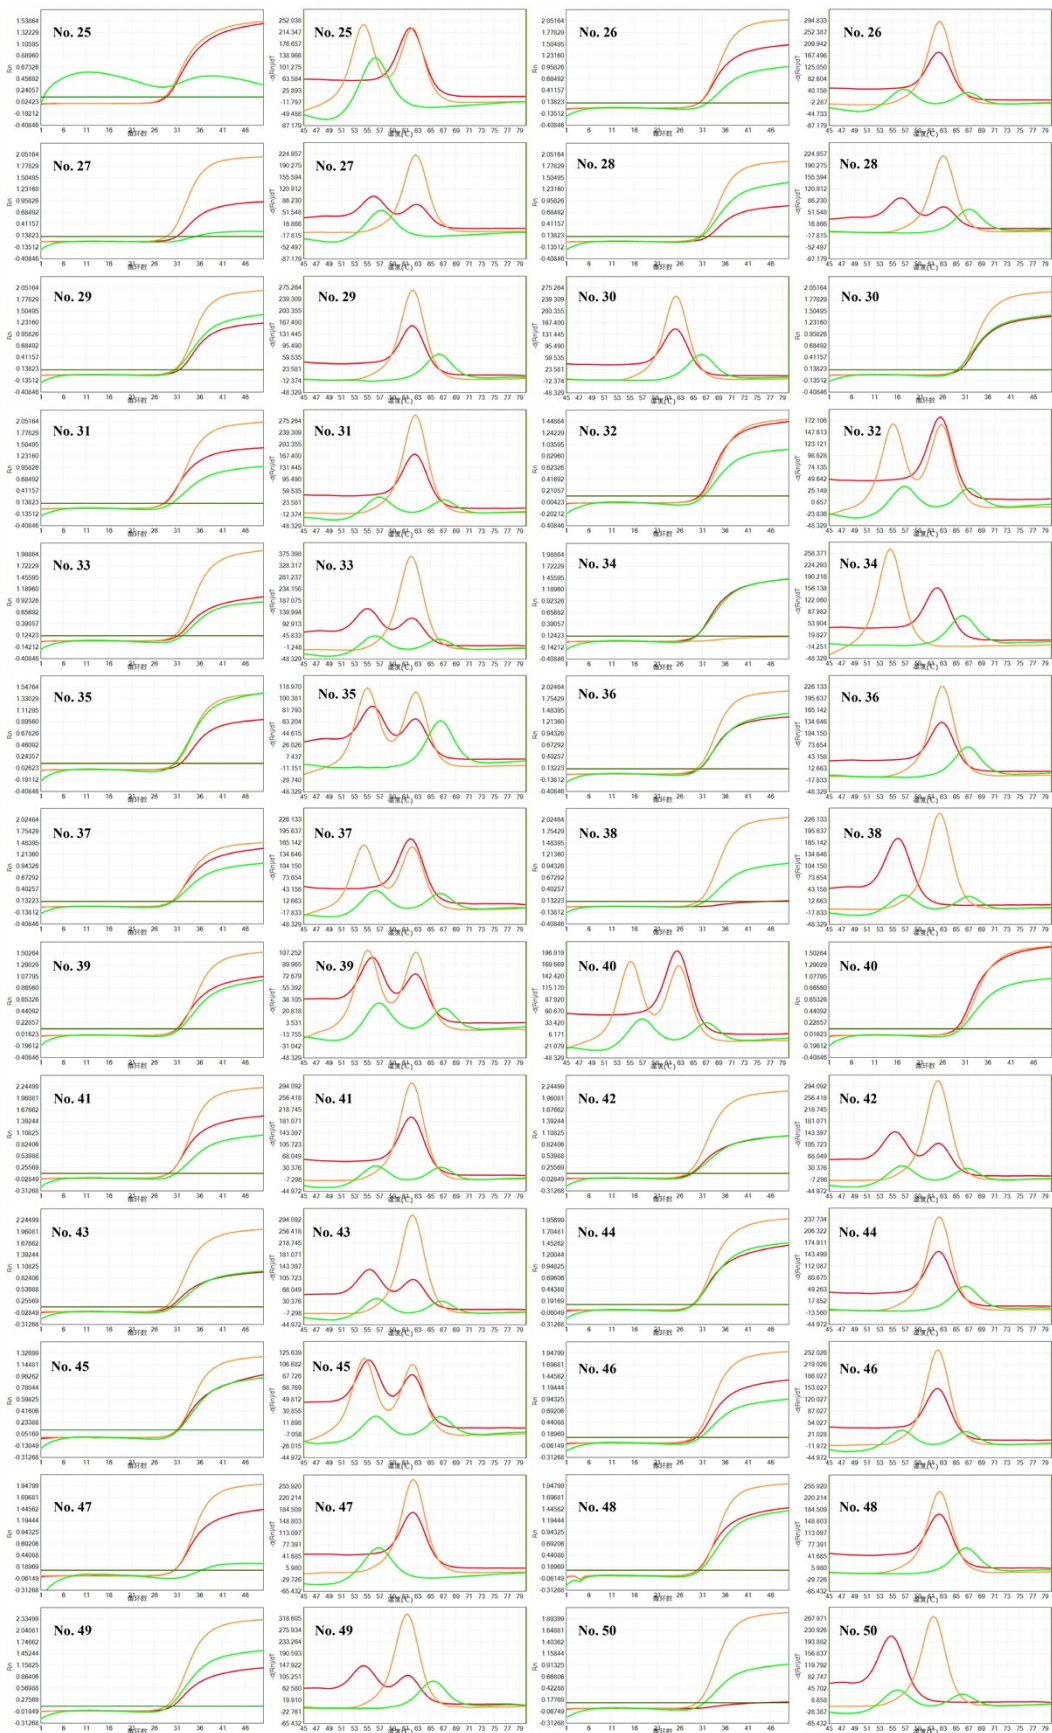

Figure S14 Amplifications and melting curves for gDNA samples of No. 25 to 50

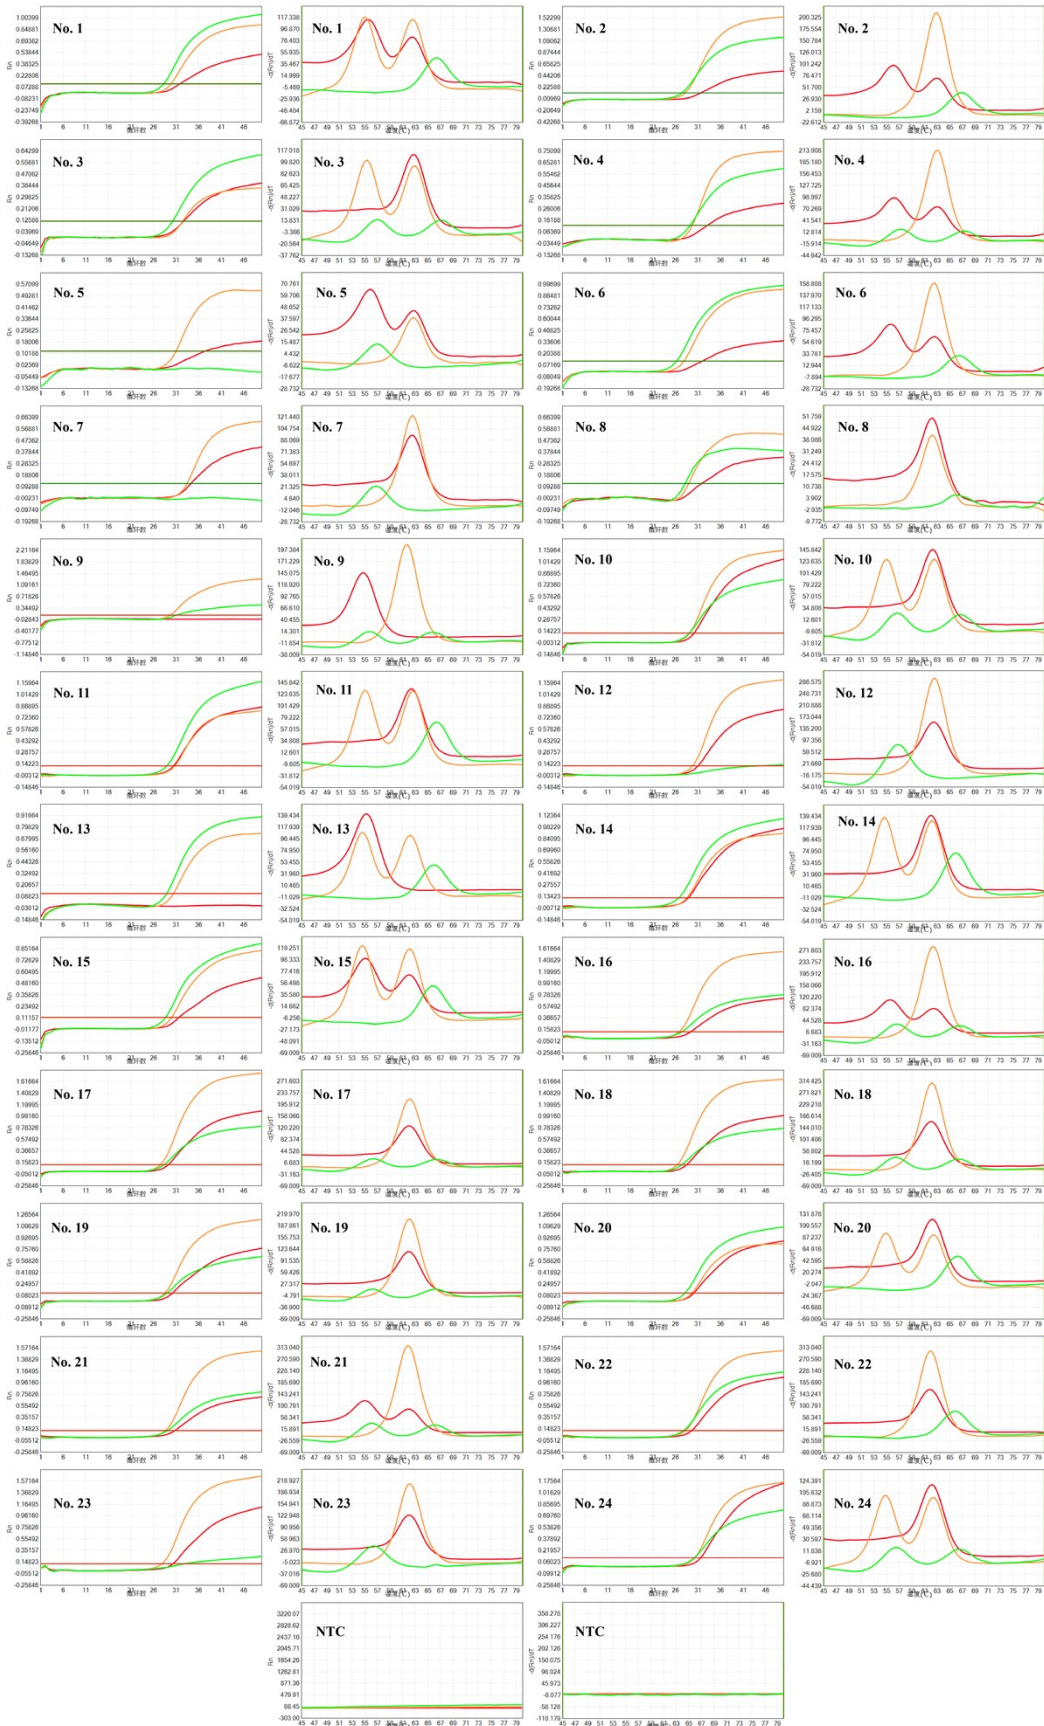

Figure S15 Amplifications and melting curves for whole blood samples of No. 1 to

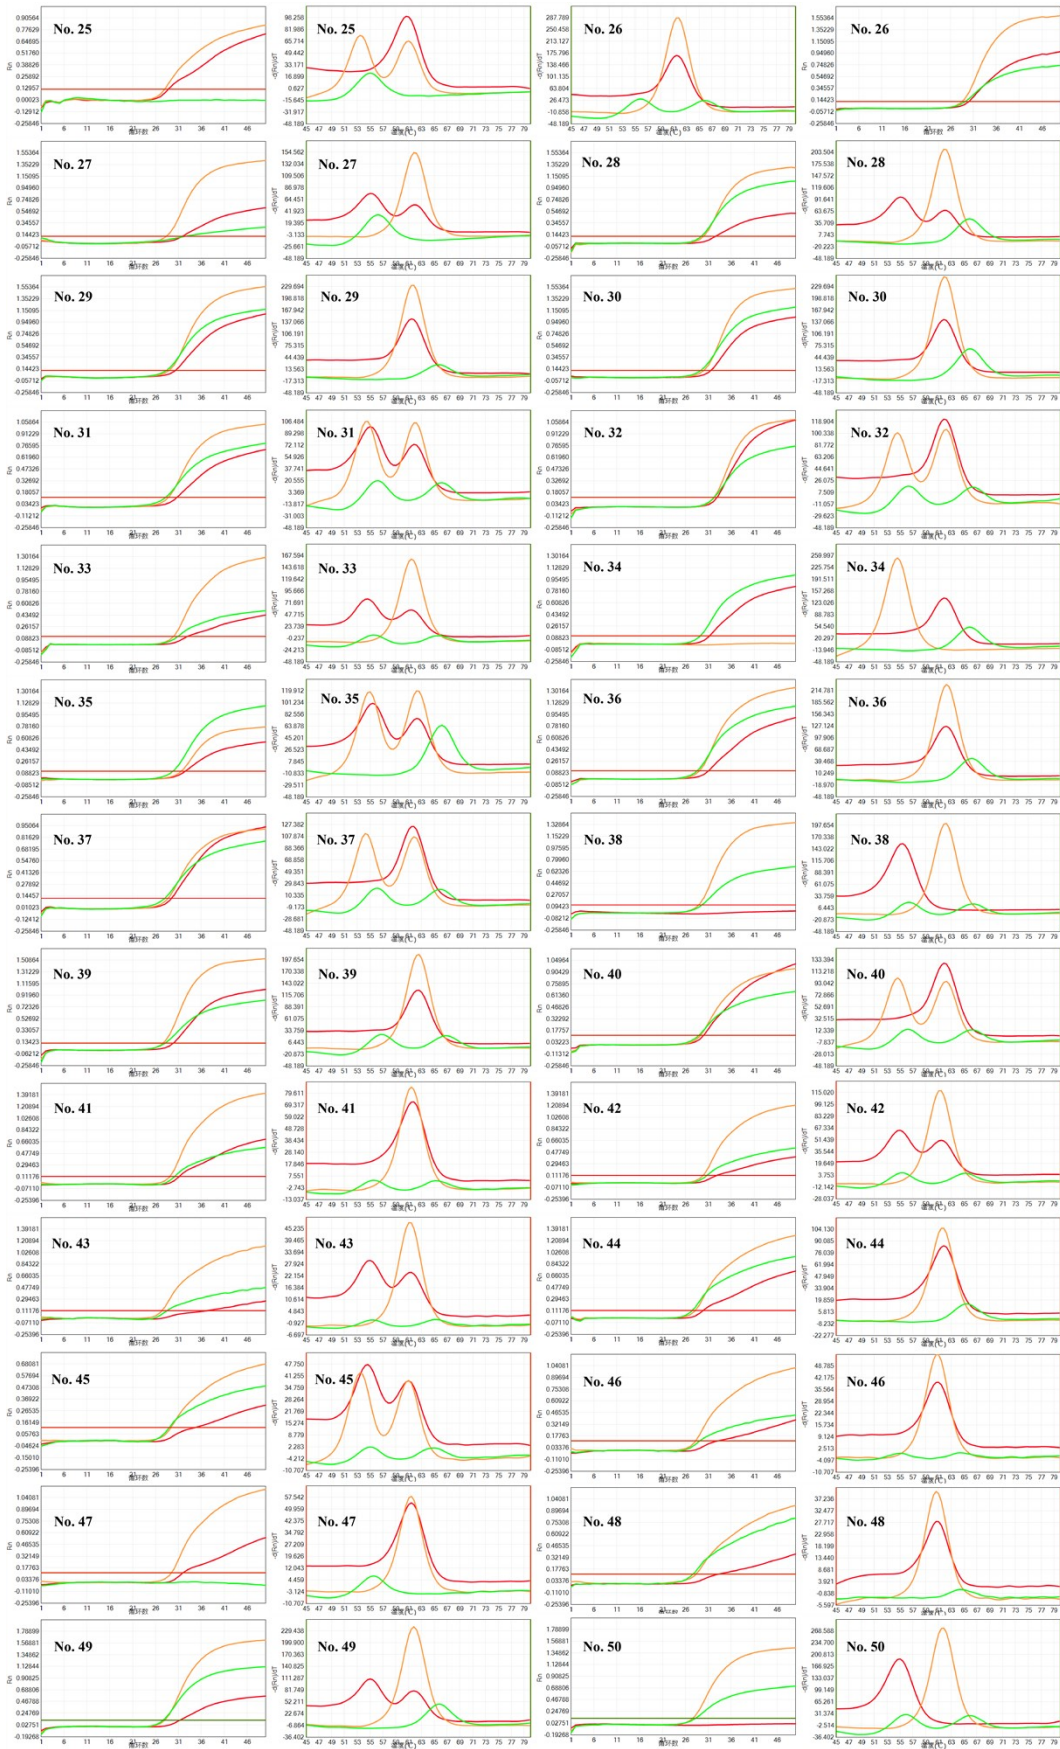



**Figure S16** Amplifications and melting curves for whole blood samples of No. 25 to 50

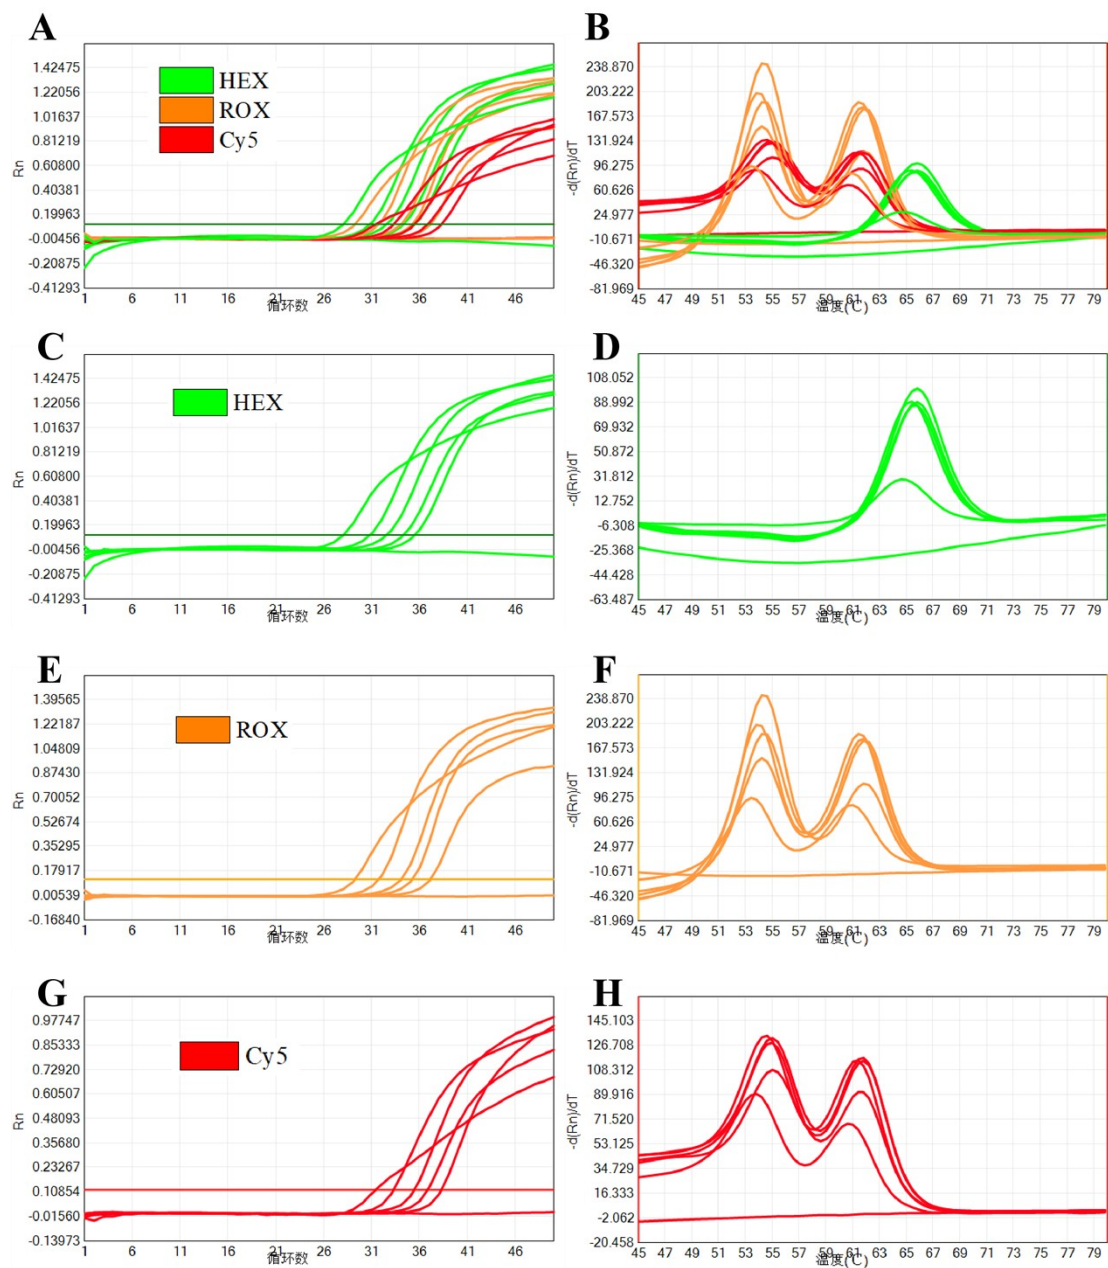

**Figure S17** Original screenshots of multiplex and individual amplifications curves (A, C, E, G), melting curves (B, D, F, H) of EDTA-K<sub>2</sub> anti-coagulated blood, gradient 1:10, 1:40, 1:160 and 1:320 dilutions of EDTA-K<sub>2</sub> treated blood.

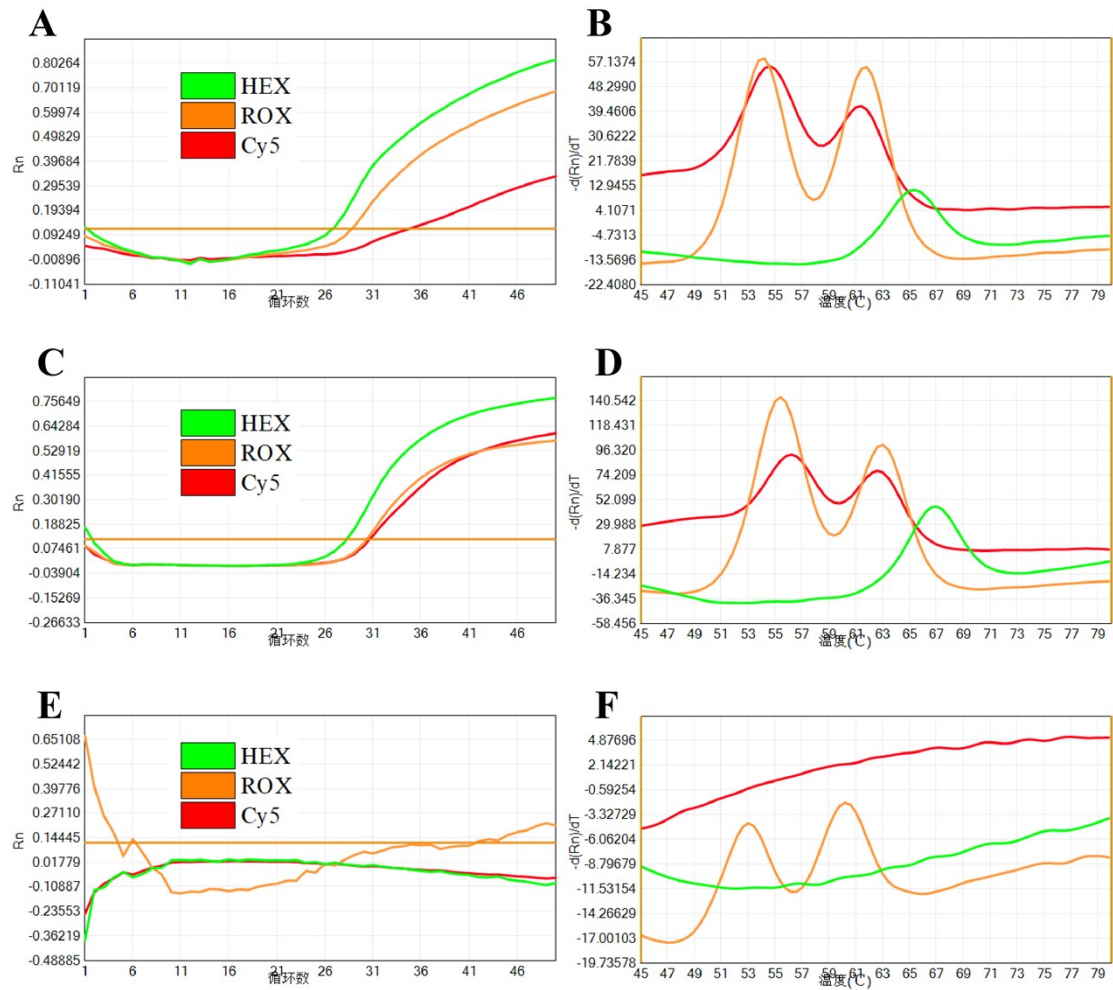

**Figure S18** Original screenshots of PCR amplification curves and melting curves for 1  $\mu\text{L}$  (A, B), 2  $\mu\text{L}$  (C, D) and 4  $\mu\text{L}$  (E, F) blood added. Total reaction volume is 20  $\mu\text{L}$ .

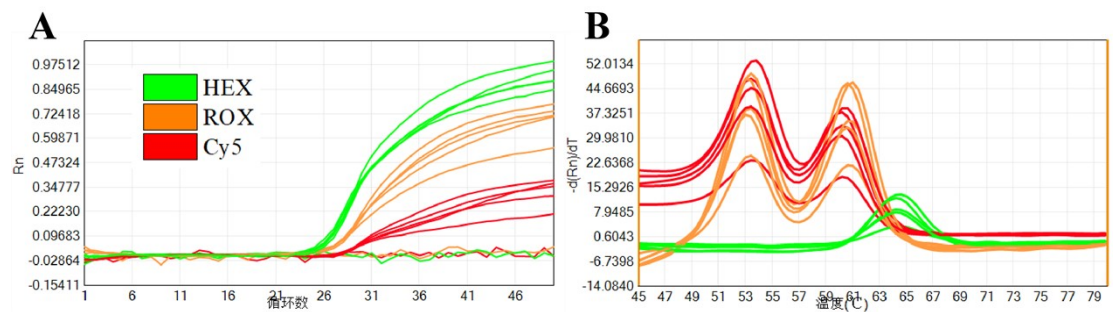

**Figure S19** Amplification curves (A) and melting curves (B) of fresh blood and frozen specimen storage at  $-20\text{ }^{\circ}\text{C}$  (sample No.1) for 1, 2, 3 and 4 weeks

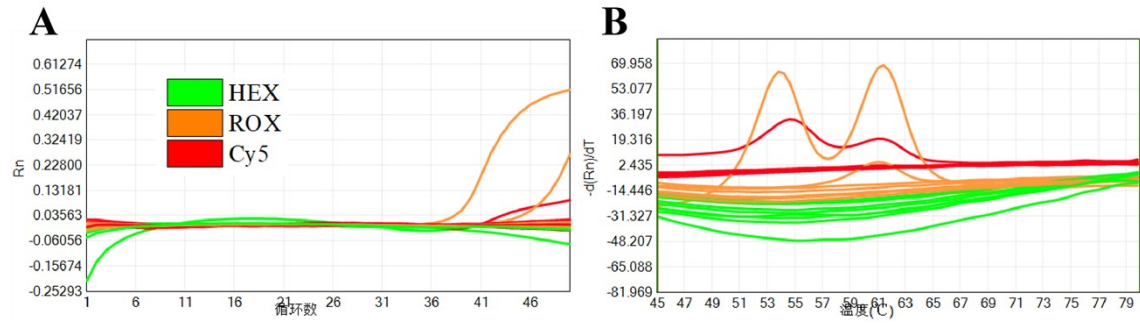

**Figure S20** Amplification curves (A) and melting curves (B) of No.1 to 8 plasma samples
